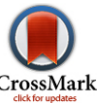

## Correction

# Correction: Prefabrication of 3D Cartilage Contructs: Towards a Tissue Engineered Auricle – A Model Tested in Rabbits

**The PLOS ONE Staff**

The last two authors, Katharina Storck and Hoang Nguyen The, should be noted as contributing equally to this work.

**Reference**

1. Bomhard Av, Veit J, Bermueller C, Rotter N, Staudenmaier R, et al. (2013) Prefabrication of 3D Cartilage Contructs: Towards a Tissue Engineered Auricle – A Model Tested in Rabbits. PLoS ONE 8(8): e71667. doi:10.1371/journal.pone.0071667

**Citation:** The PLOS ONE Staff (2014) Correction: Prefabrication of 3D Cartilage Contructs: Towards a Tissue Engineered Auricle – A Model Tested in Rabbits. PLoS ONE 9(11): e113017. doi:10.1371/journal.pone.0113017

**Published:** November 3, 2014

**Copyright:** © 2014 The PLOS ONE Staff. This is an open-access article distributed under the terms of the Creative Commons Attribution License, which permits unrestricted use, distribution, and reproduction in any medium, provided the original author and source are credited.
